# Supplementary material
Source: Springer Nature journal article supplement (https://www.springermedizin.de/resource/supplementary/12905_2011_313_MOESM2_ESM.pdf/9518414)
Supplement: MOESM2 [file 9518414]

| Dimen sions       | Illiterate (n=41)            |                            | p   | High school (n=99)           |                               | p    | University (n=80)            |                            | p   |
|-------------------|------------------------------|----------------------------|-----|------------------------------|-------------------------------|------|------------------------------|----------------------------|-----|
|                   | Employed Women Mean (%95 CI) | House wives Mean (%95 CI)  |     | Employed Women Mean (%95 CI) | House wives Mean (%95 CI)     |      | Employed Women Mean (%95 CI) | House wives Mean (%95 CI)  |     |
| Physical function | 76/66(%95CI : -31/35-17/3)   | 83/68(%95CI: -52/77-38/73) | 0/6 | 76/89(%95CI: -15/51-2/33)    | 83/46(%95CI: -15/74-2/59)     | 0/1  | 83/85(%95CI: -13/83-11/55)   | 84/99(%95CI: -16/50-14/21) | 0/8 |
| Role-emotioneal   | 16/66 (%95CI : -80/71-21/94) | 46(%95CI: -89/87-31/10)    | 0/2 | 46/62(%95CI: -24/51-7/27)    | 55/24(%95CI: -24/67-7/43)     | 0/2  | 60/35(%95CI: -13/53-39/24)   | 47/50(%95CI: -9/89-35/61)  | 0/2 |
| Bodilg pain       | 47/66 (%95CI: -44/52-25/17)  | 57/34(%95CI: -56/39-37/04) | 0/5 | 60/05(%95CI: -17/13-4/30)    | 66/46(%95CI: -16/83-4)        | 0/2  | 69/25(%95CI: -6/22-24/73)    | 60(%95CI: -6/34-24/86)     | 0/2 |
| General Health    | 38/33 (%95CI: -43/12-4/79)   | 57/5(%95CI: -76/73-38/40)  | 0/3 | 57/24[%95CI: -16/15-(-0/49)] | 65/56[%95CI : -16/31-(-0.33)] | 0/04 | 66/48(%95CI: -7/24-18/81)    | 60/70(%95CI: -8/03-19/60)  | 0/3 |
| Vitality          | 35 (%95CI: -46/22-13/85)     | 51/2(%95CI: -87/03-54/66)  | 0/4 | 57/02(%95CI: -4/06-15/37)    | 51/37(95% CI : -3/73-15/04)   | 0/2  | 61/35(%95CI: -4/80-22/52)    | 52/50(%95CI: -5/18-22/89)  | 0/1 |
| Social function   | 54/2 (%95CI : -43/60-15/09)  | 68/42(%95CI: -81/25-52/74) | 0/4 | 67/9(%95CI : -13/27-3/12)    | 72/98(%95CI: -13/34-3/18)     | 0/2  | 74/64(%95CI: -6/54-20/82)    | 67/50(%95CI: -8/04-22/32)  | 0/3 |
| Role- Physical    | 44/44 (%95CI: -59/79-48/67)  | 49/99(%95CI: -123-111/89)  | 0/8 | 52/25(%95CI: -4/77-28/63)    | 40/32(%95CI: -5/09-28/95)     | 0/1  | 56/66(%95CI: -31/88-25/21)   | 59/99(%95CI: -31/56-24/90) | 0/8 |
| Mental Health     | 48(%95CI: -40/23-21/50)      | 57/36(%95CI: -63/98-45/24) | 0/5 | 66/16(%95CI: -3/50-13/63)    | 61/09(%95CI: -3/04-13/17)     | 0/2  | 67/08(%95CI: -8/25-16/02)    | 63/20(%95CI: -11/15-18/92) | 0/5 |

**A comparison of mean and 95%CI for eight dimensions of quality of life scores in employed women and housewives basae on level of education**

This document was created with Win2PDF available at <http://www.daneprairie.com>.  
The unregistered version of Win2PDF is for evaluation or non-commercial use only.
